# Supplementary material for: R13 preserves motor performance in SOD1G93A mice by improving mitochondrial function
Source: PubMed Central journal article supplement (PMC8210609; doi:10.7150/thno.56070), 2021-05-24
Supplement: thnov11p7294s1.pdf [file thnov11p7294s1.pdf]

## Supplementary Figures

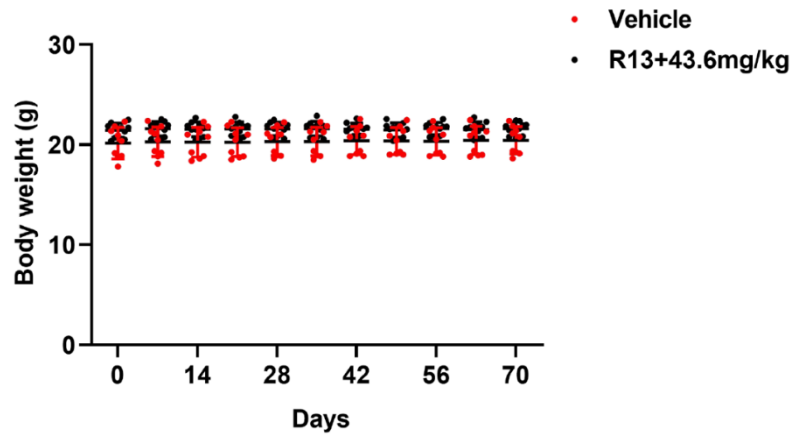

**Figure S1. The effect of R13 treatment on the body weight of SOD1<sup>G93A</sup> mice.** The body weight of SOD1<sup>G93A</sup> mice treated with 43.6 mg/kg R13 or wild type mice was detected.

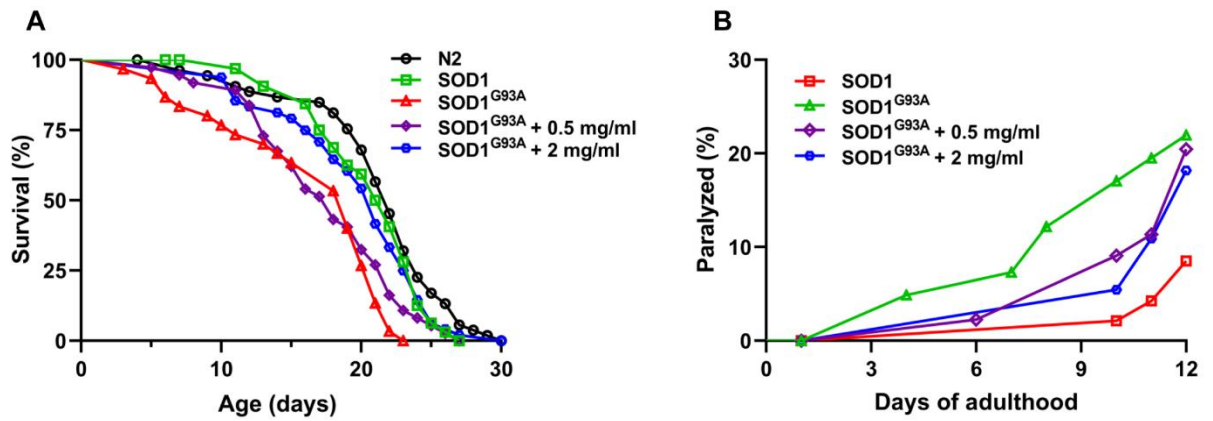

**Figure S2. The effect of 7,8-DHF (active ingredient of R13) treatment on the survival rate and paralysis rate of worms stably expressing G93A SOD1. (A)** 7,8-DHF significantly prolonged the survival rate of worms stably expressing G93A. **(B)** 7,8-DHF have no effect on the paralysis rate of worms stably expressing G93A SOD1.

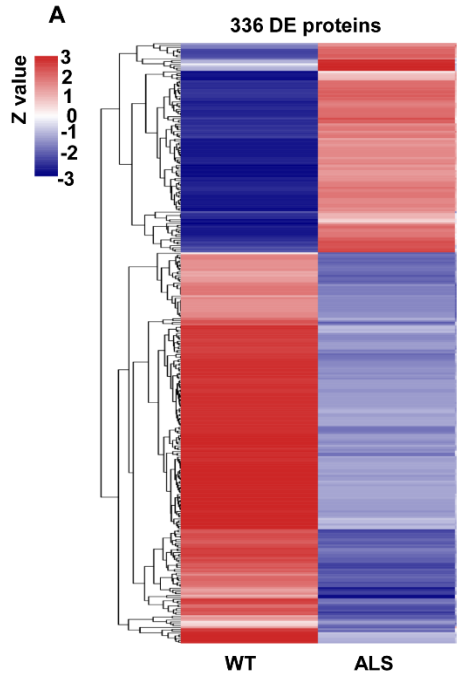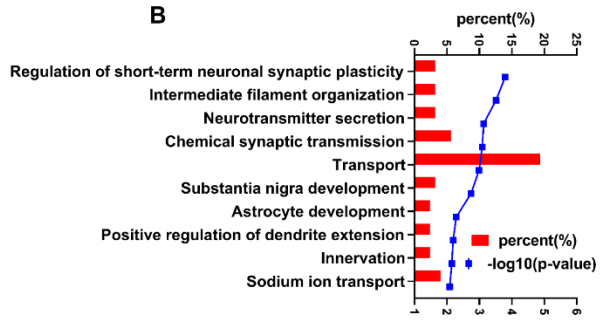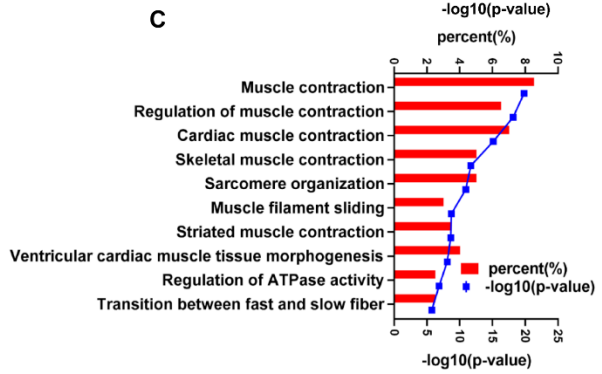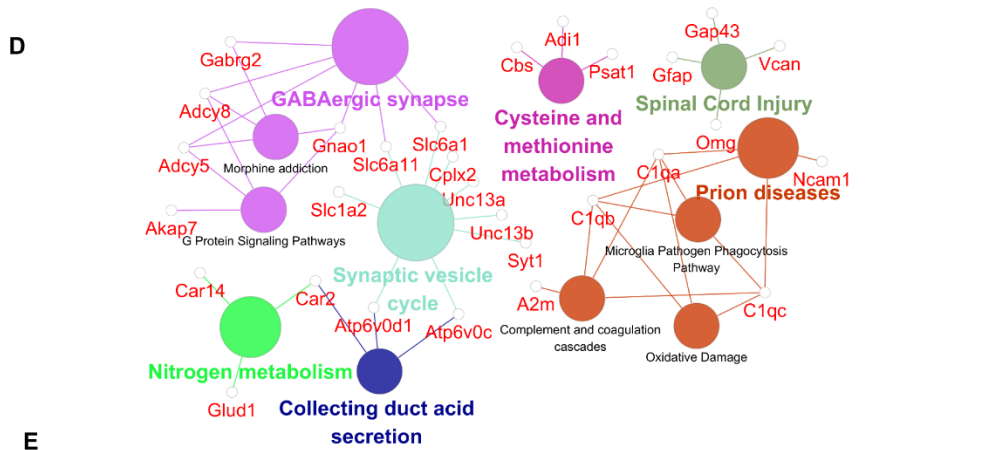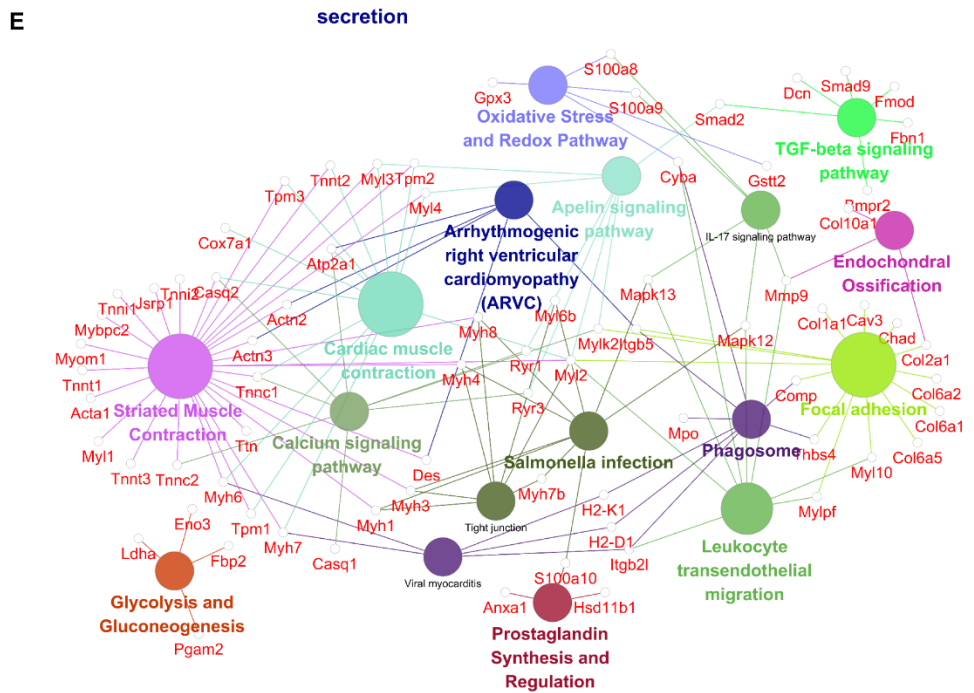

**Figure S3. Proteomics analysis of differential proteins in spinal cord of ALS mice compared with WT mice.** (A) The heatmap expression profile of differential proteins in spinal cord. (B) Biological processes involved in up-regulated proteins. (C) Biological processes involved in down-regulated proteins. ClueGo analysis for up-regulated proteins (D) and down-regulated proteins (E).

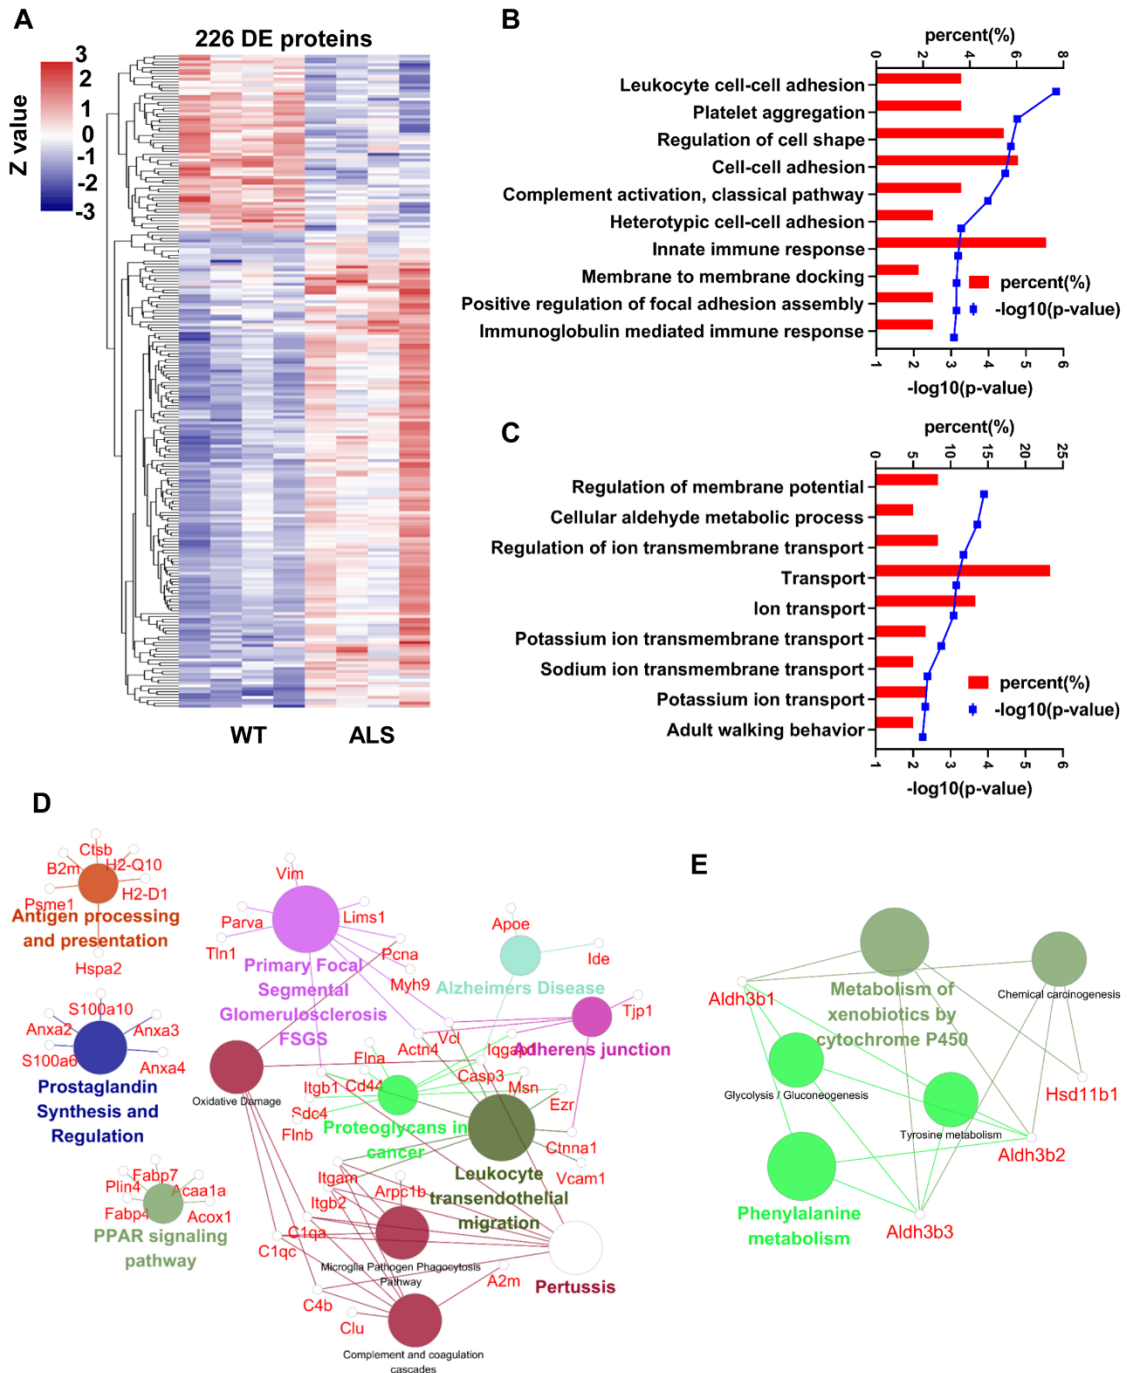

**Figure S4. Proteomics analysis of differential proteins in medulla oblongata of ALS mice compared with WT mice.** (A) The heatmap expression profile of differential proteins in medulla oblongata. (B) Biological processes involved in up-regulated proteins. (C) Biological processes involved in down-regulated proteins. ClueGo analysis for up-regulated proteins (D) and down-regulated proteins (E).

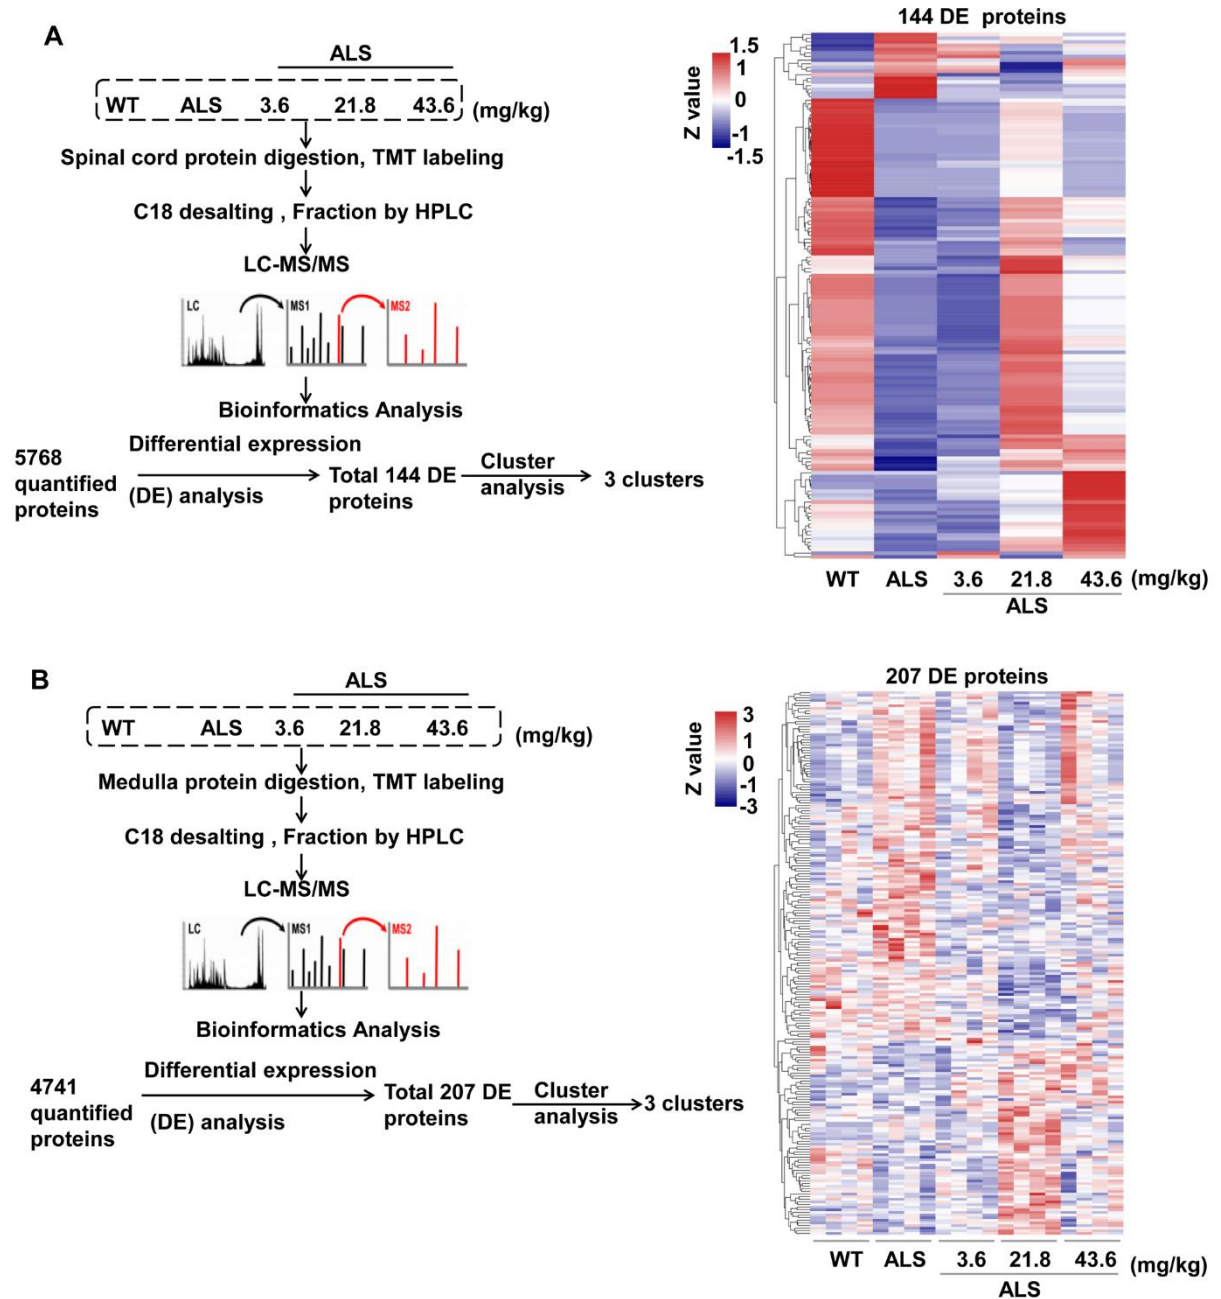

**Figure S5. Short flow chart of proteomics, and heatmap analysis for differentially expressed proteins. (A) Spinal cord proteomics process and heatmap expression profile of differential proteins. (B) The proteomics process of the medulla oblongata and the heatmap expression profile of differential proteins.**

## A Spinal cord

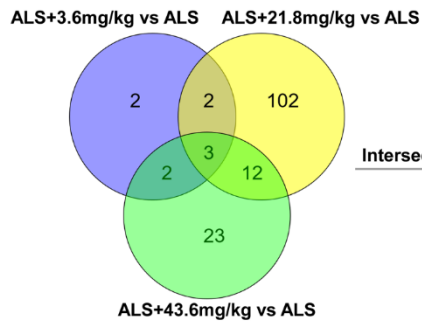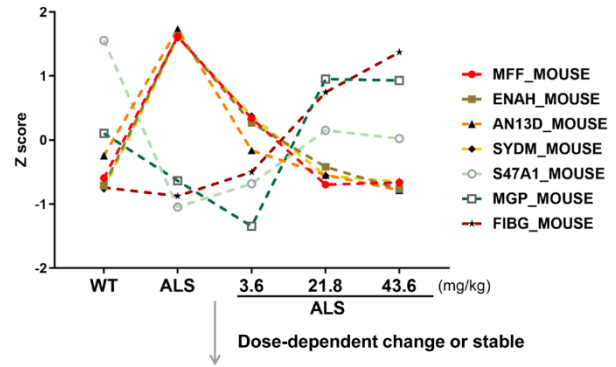

| Uniport | Accession   | Name                                         | Gene     | ALS vs WT | ALS+3.6mg/kg vs ALS | ALS+21.8mg/kg vs ALS | ALS+43.6mg/kg vs ALS |
|---------|-------------|----------------------------------------------|----------|-----------|---------------------|----------------------|----------------------|
| Q6PCP5  | MFF_MOUSE   | Mitochondrial fission factor                 | Mff      | 1.54      | 0.64                | 0.60                 | 0.65                 |
| Q03173  | ENAH_MOUSE  | Protein enabled homolog                      | Enah     | 1.68      | 0.61                | 0.62                 | 0.60                 |
| Q6PD24  | AN13D_MOUSE | Ankyrin repeat domain-containing protein 13D | Ankrd13d | 2.17      | 0.35                | 0.32                 | 0.33                 |
| Q8BIP0  | SYDM_MOUSE  | Aspartate--tRNA ligase, mitochondrial        | Dars2    | 0.47      | 1.35                | 3.32                 | 1.98                 |
| Q8K0H1  | S47A1_MOUSE | Multidrug and toxin extrusion protein 1      | Slc47a1  | 0.43      | 1.26                | 2.77                 | 1.54                 |
| P19788  | MGP_MOUSE   | Matrix Gla protein                           | Mgp      | 0.40      | 1.22                | 2.12                 | 1.56                 |
| Q8VCM7  | FIBG_MOUSE  | Fibrinogen gamma chain                       | Fgg      | 0.80      | 1.03                | 1.50                 | 1.62                 |

## B Medulla oblongata

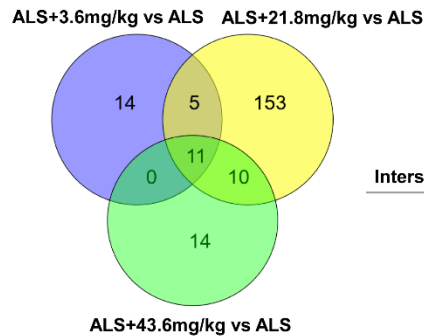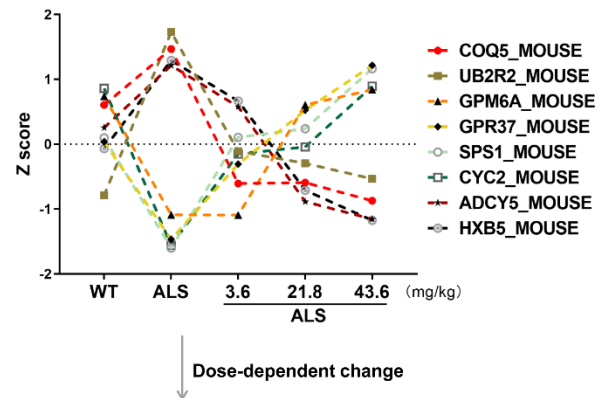

| Uniport | Accession   | Name                                                            | Gene   | ALS vs WT | ALS+3.6mg/kg vs ALS | ALS+21.8mg/kg vs ALS | ALS+43.6mg/kg vs ALS |
|---------|-------------|-----------------------------------------------------------------|--------|-----------|---------------------|----------------------|----------------------|
| Q9CXI0  | COQ5_MOUSE  | 2-methoxy-6-polyprenyl-1,4-benzoquinol methylase, mitochondrial | Coq5   | 1.18      | 0.78                | 0.76                 | 0.77                 |
| Q6ZWZ2  | UB2R2_MOUSE | Ubiquitin-conjugating enzyme E2 R2                              | Ube2r2 | 1.33      | 0.77                | 0.78                 | 0.76                 |
| P35802  | GPM6A_MOUSE | Neuronal membrane glycoprotein M6-a                             | Gpm6a  | 0.81      | 0.97                | 1.28                 | 1.23                 |
| Q9QY42  | GPR37_MOUSE | Prosaposin receptor GPR37                                       | Gpr37  | 0.92      | 1.04                | 1.17                 | 1.18                 |
| Q8BH69  | SPS1_MOUSE  | Selenide, water dikinase 1                                      | Sephs1 | 0.94      | 1.03                | 1.11                 | 1.11                 |
| P00015  | CYC2_MOUSE  | Cytochrome c, testis-specific                                   | Cyct   | 0.86      | 1.05                | 1.10                 | 1.15                 |
| P84309  | ADCY5_MOUSE | Adenylate cyclase type 5                                        | Adcy5  | 1.16      | 0.85                | 0.80                 | 0.81                 |
| P09079  | HXB5_MOUSE  | Homeobox protein Hox-B5                                         | Hoxb5  | 1.27      | 0.81                | 0.73                 | 0.72                 |

**Figure S6. Dose-dependent analysis of differentially expressed proteins.** (A) Venny analysis and dose-dependent analysis of differentially expressed proteins in spinal cord proteomic, and (B) The same analysis in medulla oblongata. The red box showed the mitochondrial protein.



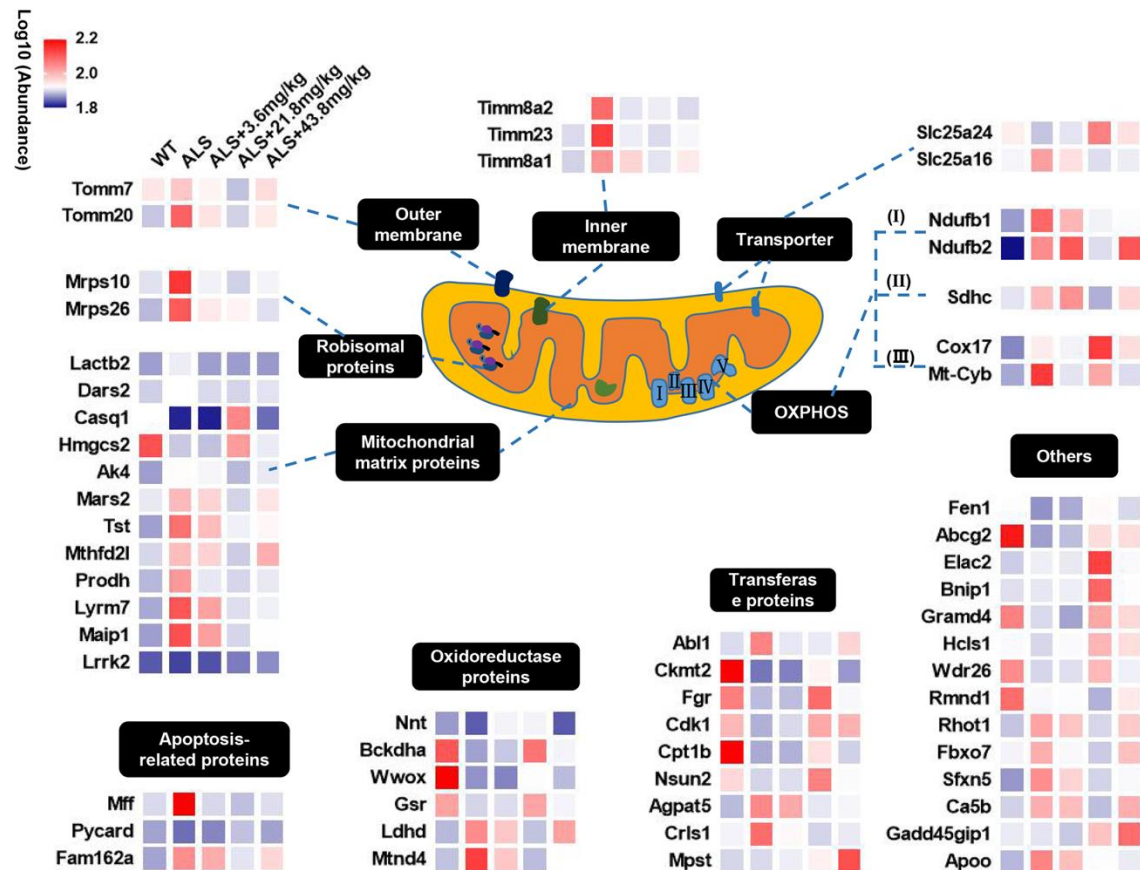

**Figure S7. Differential expression profile of mitochondria in spinal cord.**

According to uniprot database and biological functions of GO annotations, differentially expressed proteins localized to mitochondria in spinal cord were mapped to apoptosis-related proteins, outer membrane, ribosomal proteins, mitochondrial matrix proteins, mitochondrial matrix proteins, oxidoreductase proteins, inner membrane, transporter, OXPHOS, transferase proteins, and others. The expression difference was set as ratio  $\geq 1.2$  or  $\leq 0.83$ . The heatmap was color coded according to the log<sub>10</sub> abundance for proteins. The color of blue represented low abundance, red represented high abundance.

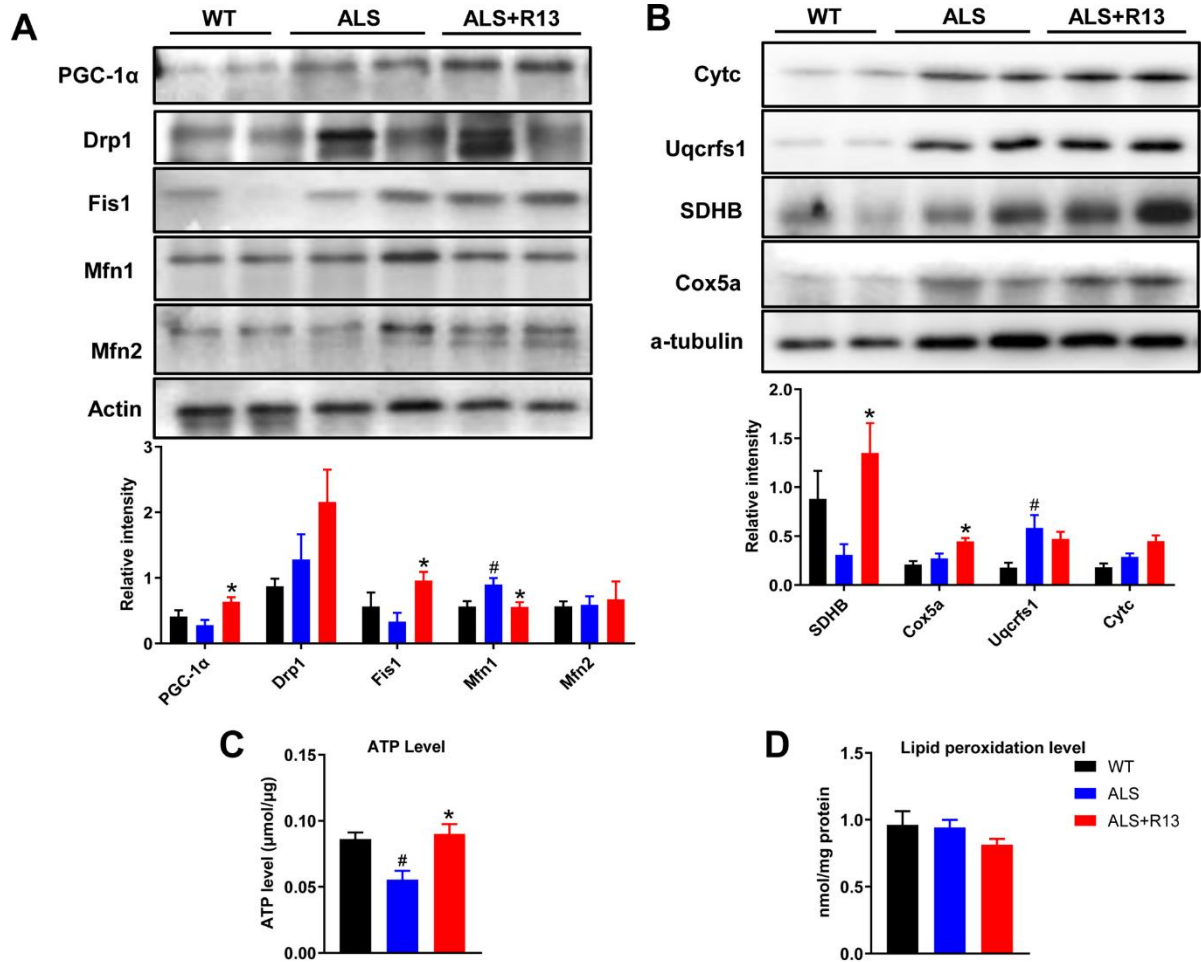

**Figure S8. R13 treatment ameliorated mitochondrial function in spinal cord.** (A) The expression of PGC-1 $\alpha$ , Drp1, Fis1, Mfn1 and Mfn2, and (B) the electron transport chain proteins of Uqcrrf1, SDHB, Cox5a and Cytc were detected by Western blotting and quantitative analysis. (C-D) The levels of ATP and lipid peroxidation were detected. Data was expressed as Mean  $\pm$  SEM. \*,  $p < 0.05$  vs. ALS vehicle group. #,  $p < 0.05$ , ##,  $p < 0.01$  vs. WT group.  $n = 4$  for each group.

Spinal Cord

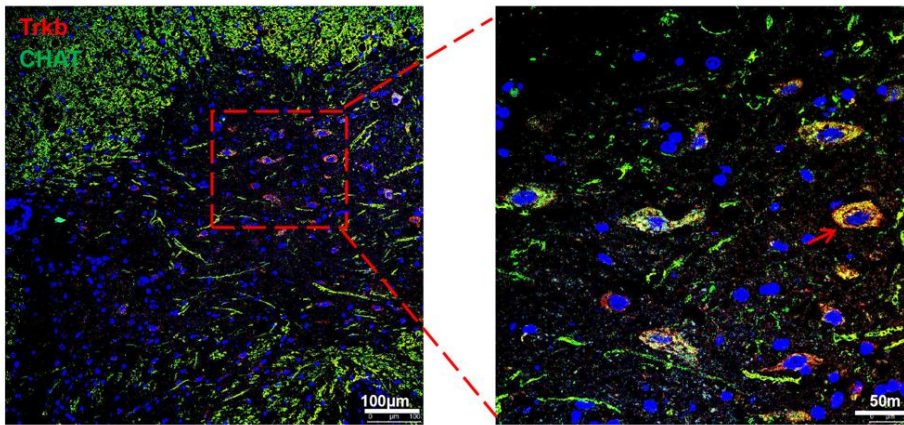

**Figure S9. TrkB receptor localized in motor neurons of spinal cord.** The representative image of co-localization of CHAT and TrkB receptors in motor neurons of spinal cord.

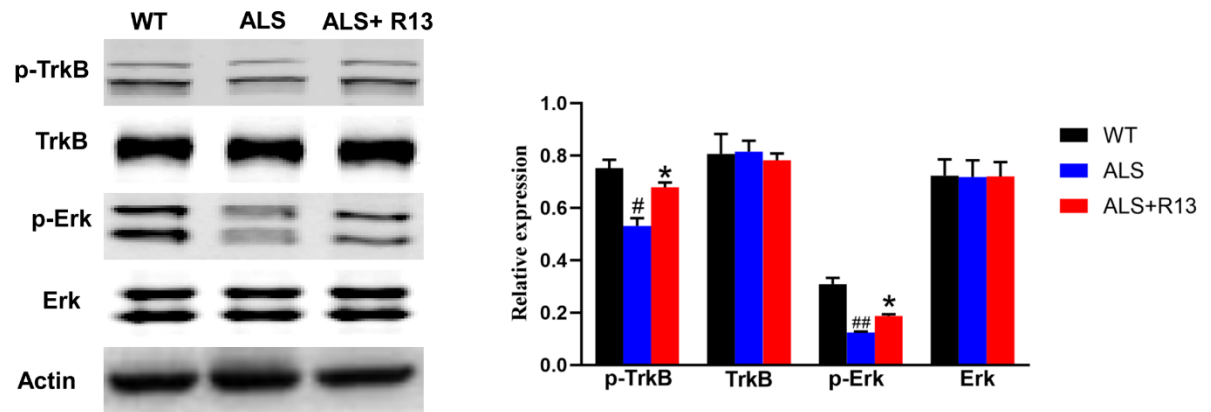

**Figure S10. R13 activated the TrkB receptor signaling in motor cortex.** The p-TrkB, TrkB, p-Erk and Erk were monitored by Western blotting and quantitatively analyzed. Data was expressed as Mean  $\pm$  SEM. \*,  $p < 0.05$  vs. ALS vehicle group. #,  $p < 0.05$ , ##,  $p < 0.01$  vs. WT group.  $n = 3$  for each group.

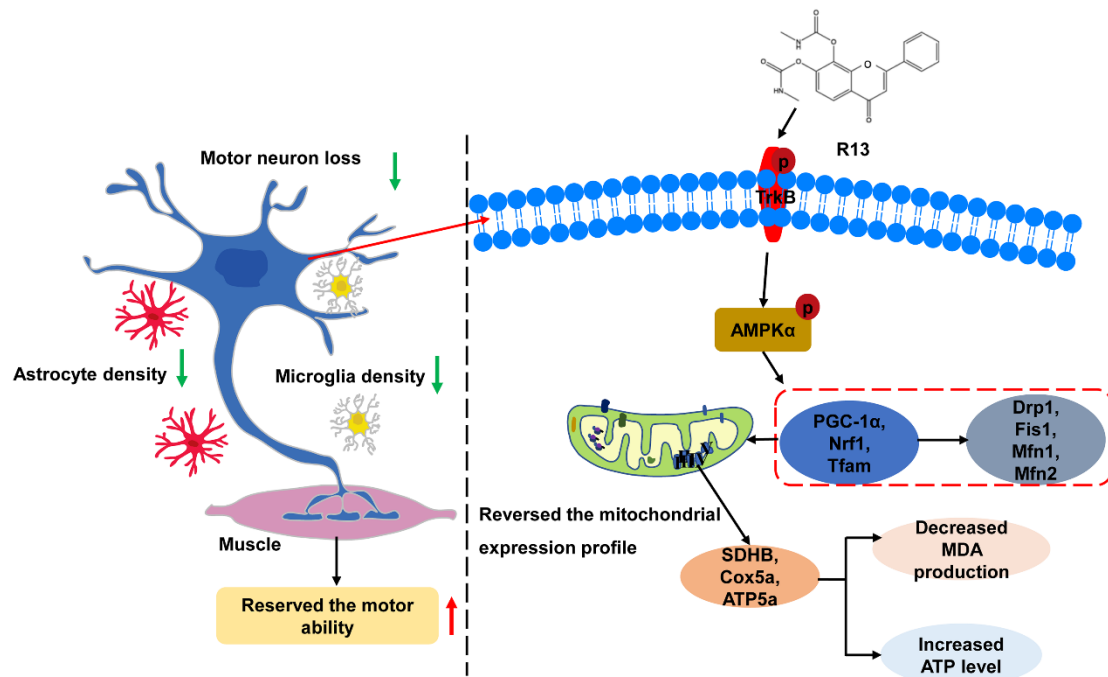

**Figure S11. The possible mechanism of R13 in the treatment of SOD1<sup>G93A</sup>.** R13 activated AMPK to promote mitochondria biogenesis and fission via TrkB, and ameliorated mitochondrial proteins expression with increased ATP level and decreased lipid peroxidation level (MDA). R13 also suppressed the proliferation of glial cells, attenuated motor neurons loss, and ameliorated gastrocnemius function by upregulation of the proteins involving in striated muscle contraction pathway. All of these contributed to improve the motor ability of SOD1<sup>G93A</sup> mice.

**Supplementary Table 1 The dilution ratios and product information of antibodies**

| <b>Antibody</b>   | <b>Specificity</b>                  | <b>Type</b> | <b>Dilution</b> | <b>Source</b>  | <b>CAT NO.</b> |
|-------------------|-------------------------------------|-------------|-----------------|----------------|----------------|
| p-TrkB            | Anti-phospho-TrkB (Tyr816) Antibody | Rabbit      | 1/500           | sigma          | ABN1381        |
| TrkB              | TrkB Antibody                       | Rabbit      | 1/1000          | Biovision      | 3593           |
| p-Akt             | Phospho-Akt (Ser473)                | Rabbit      | 1/1000          | Cell Signaling | 4060           |
| Akt               | Akt                                 | Rabbit      | 1/1000          | Cell Signaling | 4691           |
| p-AMPK $\alpha$   | Phospho-AMPK $\alpha$ (Thr172)      | Rabbit      | 1/1000          | Cell Signaling | 2535           |
| AMPK $\alpha$     | AMPK $\alpha$                       | Rabbit      | 1/1000          | Cell Signaling | 2532           |
| $\alpha$ -tubulin | Anti-Tubulin Antibody               | Mouse       | 1/1000          | Merck          | MAB1637        |
| PGC1- $\alpha$    | Anti-PGC1 alpha                     | Rabbit      | 1/1000          | Abcam          | ab54481        |
| Nrf1              | Anti-Nrf1                           | Rabbit      | 1/1000          | Abcam          | ab175932       |
| Tfam              | Anti-mtTFA                          | Rabbit      | 1/1000          | Abcam          | ab131607       |
| Drp1              | Drp1                                | Mouse       | 1/1000          | Santa Cruz     | sc-271583      |
| Fis1              | Fis1                                | Rabbit      | 1/1000          | proteintech    | 10956-1-AP     |
| Mfn1              | Mitofusin 1                         | Mouse       | 1/1000          | Abcam          | ab57602        |
| Mfn2              | Mitofusin 2                         | Rabbit      | 1/1000          | proteintech    | 12186-1-AP     |
| Uqcrcf1           | Anti-UQCRCF1/RISP                   | Rabbit      | 1/1000          | Abcam          | ab131152       |
| ATP5a             | Anti-ATP5A                          | Rabbit      | 1/1000          | Abcam          | ab14748        |
| cytc              | Cytochrome c                        | Rabbit      | 1/1000          | Cell Signaling | 11940          |
| SDHB              | Anti-SDHB                           | Mouse       | 1/1000          | Abcam          | ab14714        |
| Cox5a             | Anti-COX5A                          | Mouse       | 1/1000          | Abcam          | ab110262       |
| Actin             | $\beta$ -Actin                      | Mouse       | 1/1000          | Santa Cruz     | sc-47778       |
